# Supplementary material for: A Tead1-Apelin axis directs paracrine communication from myogenic to endothelial cells in skeletal muscle
Source: PubMed Central journal article supplement — iScience. 2022 Jun 14;25(7):104589. doi: 10.1016/j.isci.2022.104589 (PMC9250016; doi:10.1016/j.isci.2022.104589), 2022-06-14
Supplement: mmc1.pdf [file mmc1.pdf]

**Supplemental information**

**A Tead1-Apelin axis directs paracrine  
communication from myogenic  
to endothelial cells in skeletal muscle**

**Umji Lee, Pascal Stuelsatz, Sonia Karaz, David W. McKellar, Julie Russeil, Maria Deak, Iwijn De Vlaminck, Christoph Lepper, Bart Deplancke, Benjamin D. Cosgrove, and Jerome N. Feige**

## **SUPPLEMENTARY MATERIALS**

### **Supplementary Figure 1.**

**Characterization of the *ApIn* promoter and identification of transcription factors in Yeast 1 Hybrid screen, Related to Figure 1.**

### **Supplementary Figure 2.**

**Effects of *Zfp319* and *Zdhhc9* on *ApIn* expression in C2C12 cells, Related to Figure 1.**

### **Supplementary Figure 3.**

**Expression profiles of single-cell RNA-sequencing clusters, Related to Figure 3.**

### **Supplementary Figure 4.**

**Expression profiles of six transcription factors in Y1H from single-cell and nucleus RNA-sequencing datasets, Related to Figure 3.**

**Supplementary Table 1. Primers used for Chromatin Immunoprecipitation (ChIP) qPCR Assay, Related to Figure 1.**

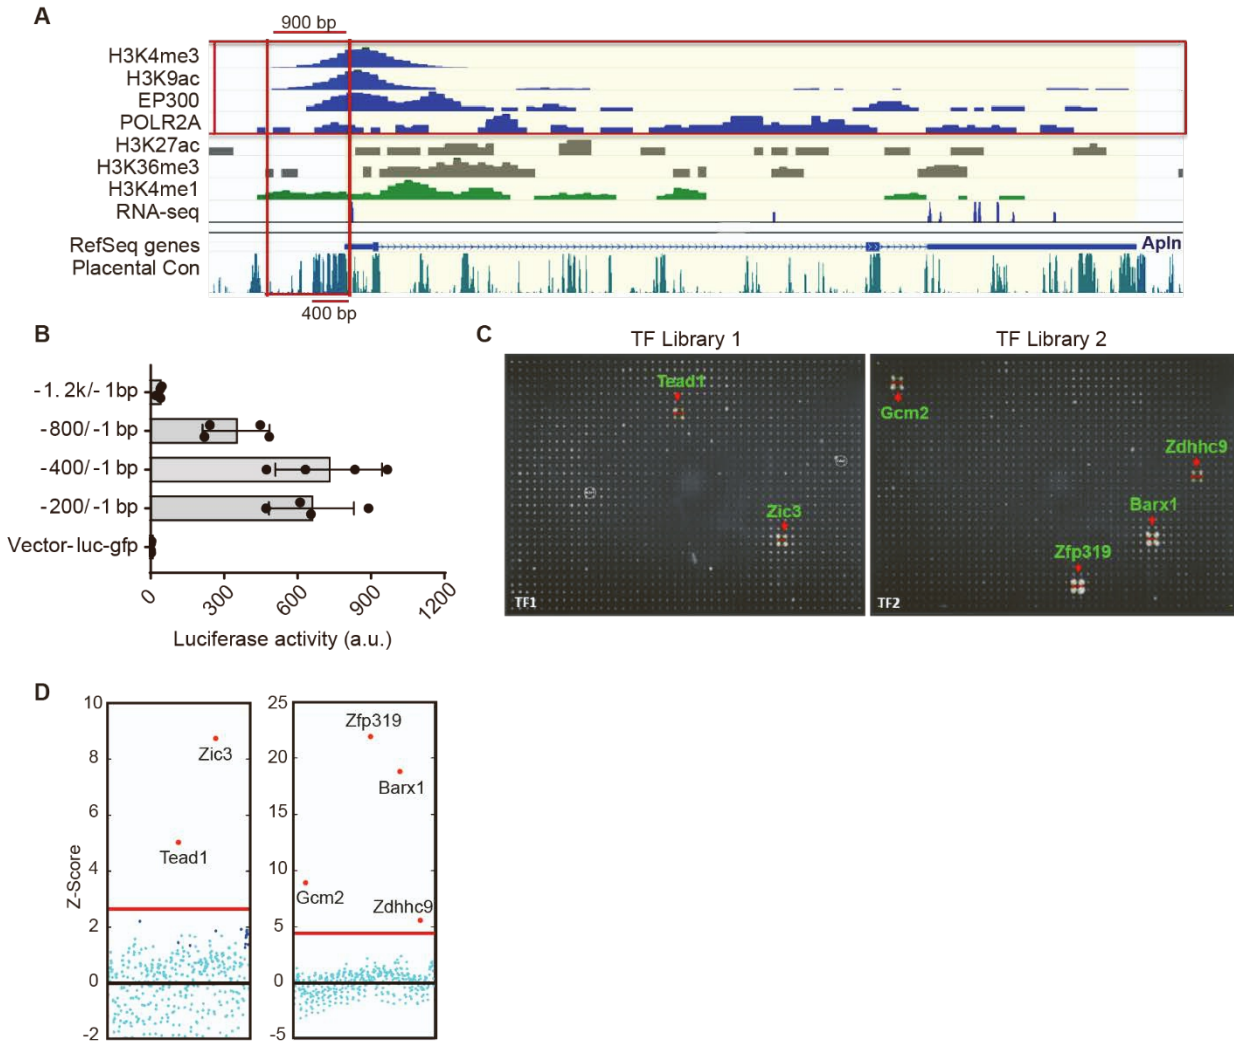

**Supplementary Figure 1. Characterization of the *Apln* promoter and identification of transcription factors in Yeast 1 Hybrid screen, Related to Figure 1. (A)** Epigenomic annotation near the TSS of apelin precursor gene (*Apln*) in mouse ES-Bruce4 cells from the WashU Epigenome Browser. Tag densities (blue) of proximal promoter markers H3K4me3, H3K9ac, EP300, and POLR2A by ChIP-seq are highlighted (top). Placental Con represents the conservation score between 20 mammalian species available from WashU Epigenome Browser (Miller et al., 2007) **(B)** Nano luciferase activity of four putative *Apln* promoter regions and no-promoter vector transfected into C2C12 cells, normalized by co-transfected firefly luciferase activity. Mean  $\pm$  s.e.m. of  $n = 4$  cell culture replicates per group. **(C)** Y1H screen growth cluster results using -400/-1bp fragment of *Apln* promoter mated with two TF libraries. **(D)** Z-score-normalized Y1H spot intensities for all 745 TF-promoter interactions using -400/-1bp promoter fragments.

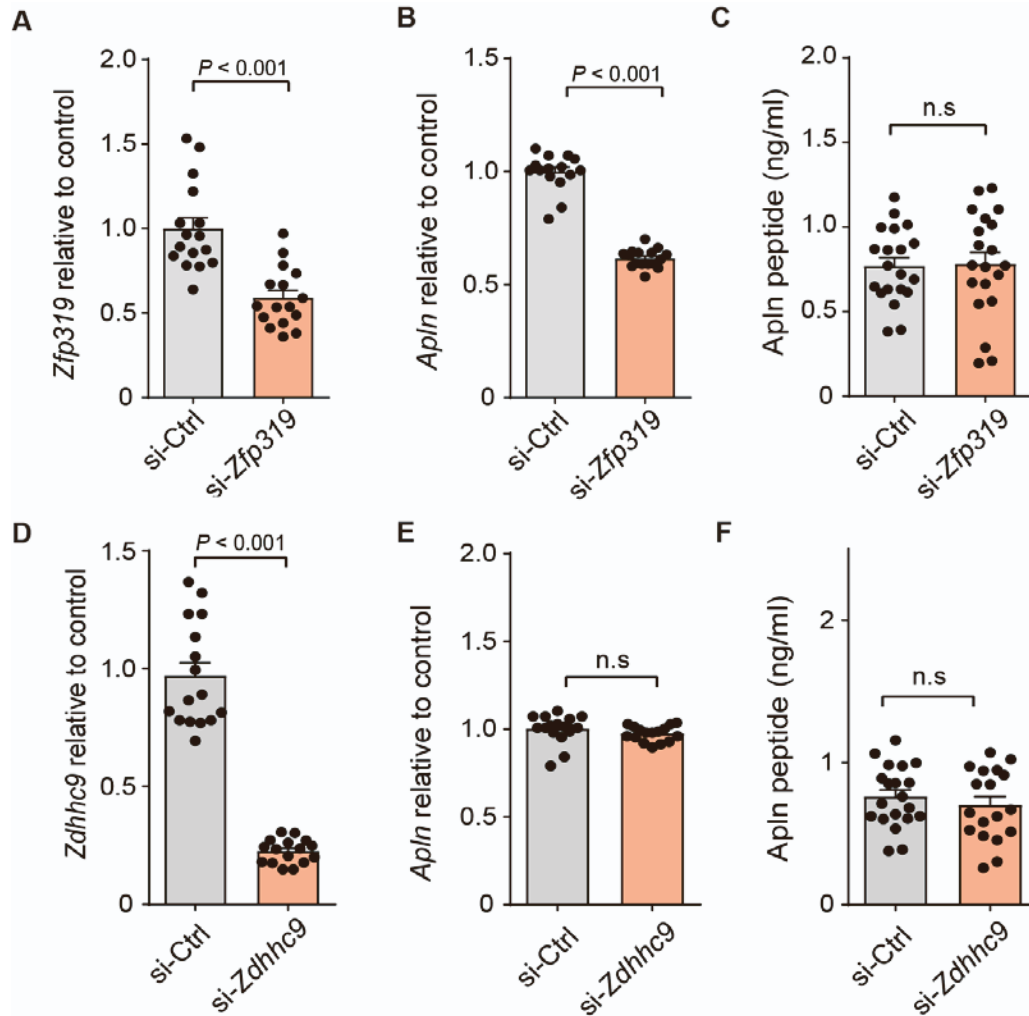

**Supplementary Figure 2. Effects of Zfp319 and Zdhhc9 on *Apln* expression in C2C12 cells, Related to Figure 1. (A-B) *Zfp319* (A) and *Apln* (B) mRNA expression measured by RT-qPCR in C2C12 myoblasts transfected with scrambled control or *Zfp319* targeted siRNA for 3 d, n = 16 cell culture replicates per condition. (C) *Apln* peptide concentration in culture medium measured by enzyme immunoassay (EIA) after 3 d culture from the same experiment. n = 20 cell culture supernatants per condition. (D-E) *Zdhhc9* (D) and *Apln* (E) mRNA expression in C2C12 myoblasts transfected with scrambled control or *Zdhhc9* targeted siRNA for 3 d, n = 16 cell culture replicates per condition. (F) *Apln* peptide concentration in culture medium measured by enzyme immunoassay (EIA) after 3 d culture from the same experiment. n = 20 from one experiment. For all panels, data are presented as mean  $\pm$  s.e.m., and *P* values are reported from two-tailed, unpaired t-tests between conditions.**

A

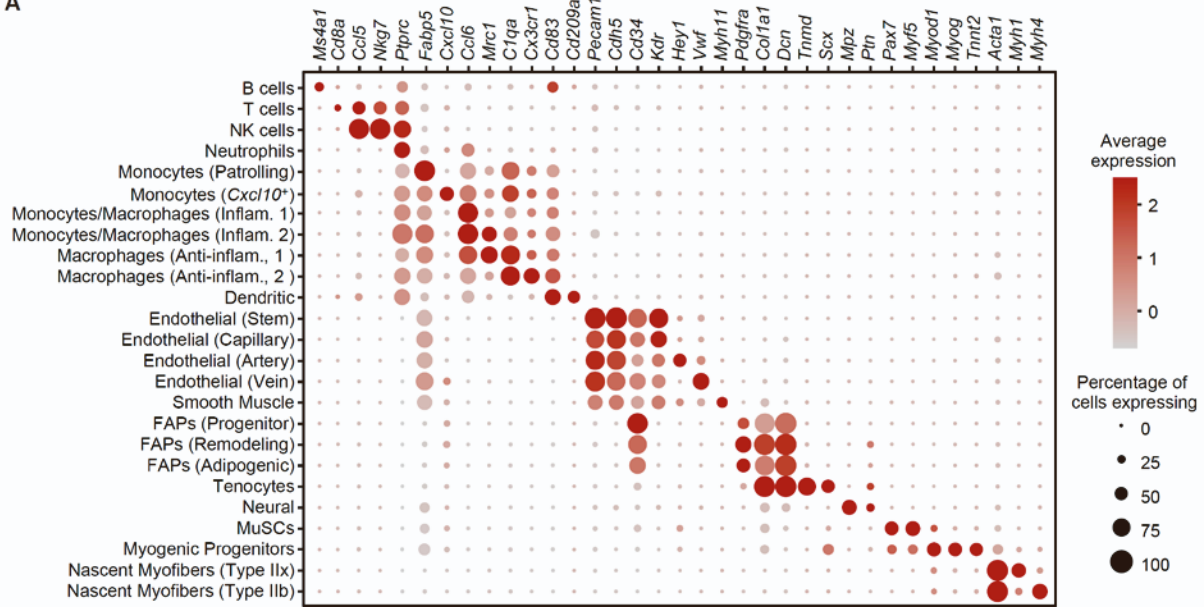

**Supplementary Figure 3. Expression profiles of single-cell RNA-sequencing clusters, Related to Figure 3. (A)** Dot plots representing marker gene expression used to characterize cell clusters in the single-cell RNA-sequencing muscle regeneration data set from **Figure 3C-E**. Cell clustering was performed using SNN and annotations were manually determined based on these gene expression patterns. For each gene/cluster combination, the average expression level is shown in red color and the fraction of cells with non-zero expression is shown as the dot size. Some clusters shown here are not plotted in **Figure 3E** if not consistently observed at different time-points in the dataset.

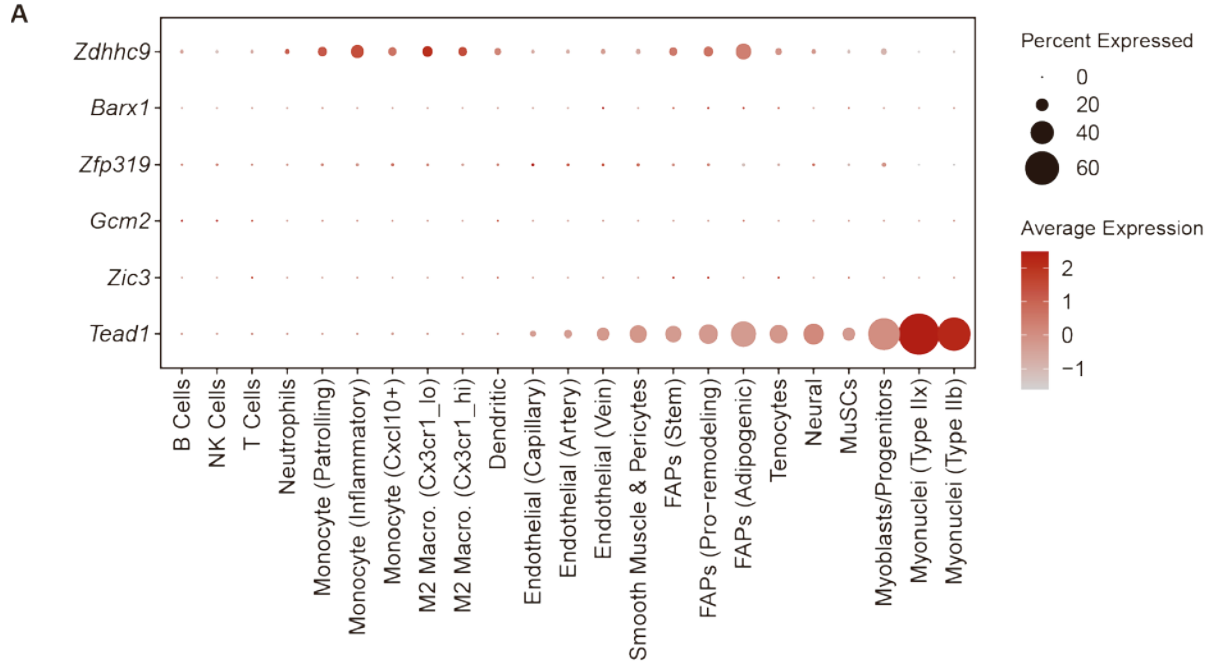

**Supplementary Figure 4. Expression profiles of six transcription factors in Y1H from single-cell and nucleus RNA-sequencing datasets, Related to Figure 3. (A)** Dot plots representing cell-specific TF gene expression from integrated 102 publically-available single-cell or nucleus RNA-sequencing datasets by harmony batch-correction (McKellar et al., 2020).

| Gene                | Forward Primer       | Reverse Primer         | Genomic Coordinates       |
|---------------------|----------------------|------------------------|---------------------------|
| <i>Ankrd</i>        | GAGGGGAGGACAAGCTAACC | CGATGTGATCACCACCAAAG   | Chr10:92681001–92681083   |
| <i>Ctgf</i>         | GCCAATGAGCTGAATGGAGT | CAATCCGGTGTGAGTTGATG   | Chr6:132272566–132272653  |
| <i>Apln</i>         | CTCTCCCTCTTCCTGCCTC  | TTTTGTAGCTTGTGGTTTGGC  | Chr X:48034975 - 48034875 |
| <i>Neg- control</i> | ACCAACACTCTTCCTCAGC  | TTATTTTGGTTCAGGTGGTTGA | Chr10:60902566–60902665   |

**Supplementary Table 1. Primers used for Chromatin Immunoprecipitation (ChIP) qPCR Assay, Related to Figure 1.** Forward and reverse primers to detect *Ankrd1*, *Ctgf*, *Apln*, *Neg* promoters in ChIP-qPCR detection.
